# Supplementary material
Source: publisher figshare collection journal article supplement (https://frontiersin.figshare.com/ndownloader/files/20754816)
Supplement: Supplementary file [file 20754816]

Supplementary Figure 1, da Silva et al

A

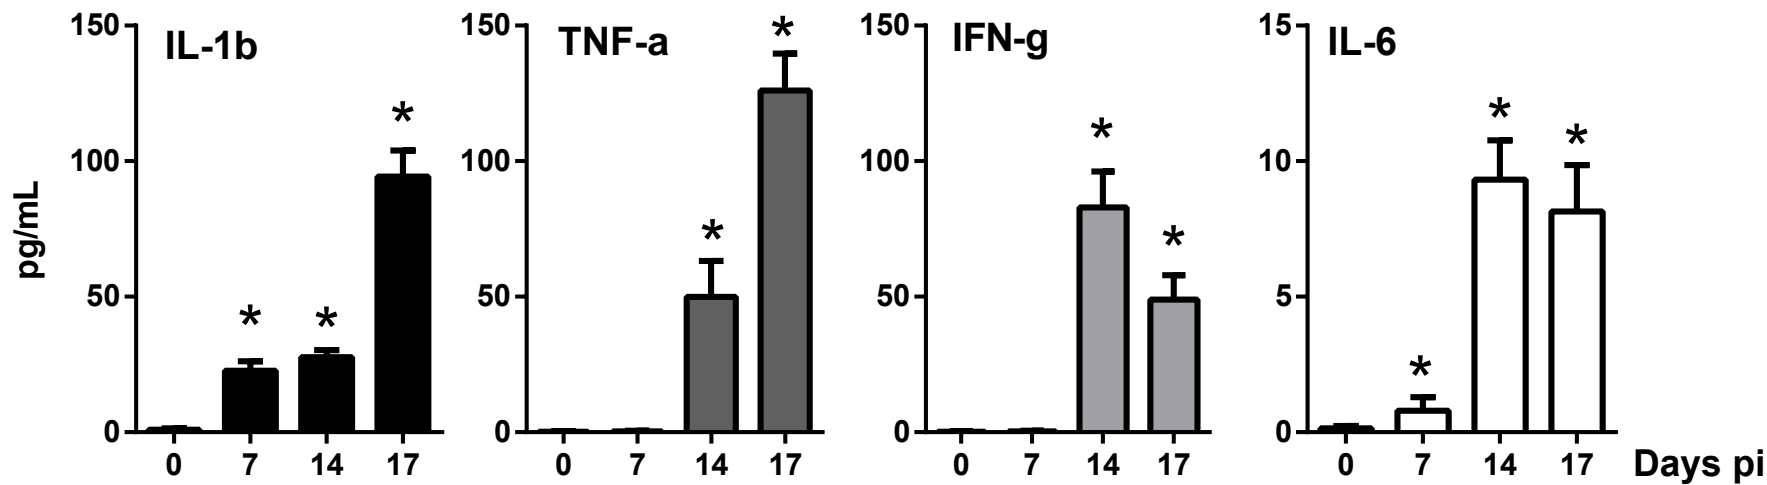

B

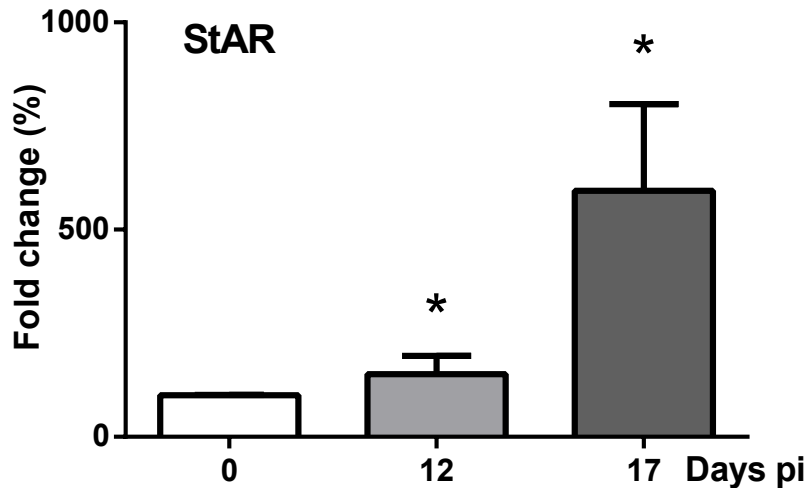

## LEGEND SUPPLEMENTARY FIGURE

**Supplementary Figure 1: A.** Plasma levels of HPA axis-activating cytokines during *T. cruzi* infection. Plasma levels of IL-1 $\beta$ , TNF- $\alpha$ , IFN- $\gamma$  and IL-6 were assessed throughout acute infection. **B.** StAR ARNm expression in adrenal glands from Tc-infected mice during infection, assayed by RT-qPCR. Data are expressed as mean  $\pm$  SEM, from 3-5 mice/group/day. Results are representative from at least three independent experimental rounds. In all cases \* $p < 0.05$  vs. day 0 pi. n.d.: Non-detectable; pi: post-infection; AU: arbitrary units.
